# Supplementary material for: Assessment of Strategic Healthcare Purchasing Arrangements and Functions Towards Universal Coverage in Tanzania
Source: PubMed Central journal article supplement (PMC10105173; doi:10.34172/ijhpm.2022.6234), 2022-08-01
Supplement: ijhpm-11-3079-s001.pdf [file ijhpm-11-3079-s001.pdf]

**Article title:** Assessment of Strategic Healthcare Purchasing Arrangements and Functions Towards Universal Coverage in Tanzania

**Journal name:** International Journal of Health Policy and Management (IJHPM)

**Authors' information:** August Kuwawenaruwa\*, Suzan Makawia, Peter Binyaruka, Fatuma Manzi Ifakara Health Institute, Dar es Salaam, Tanzania.

(corresponding author: [ajoachim@ihi.or.tz](mailto:ajoachim@ihi.or.tz))

## Supplementary file 1

**Table S1: Documents reviewed in the study**

| Number | Name of the document                                                                                                                                                               | Year |
|--------|------------------------------------------------------------------------------------------------------------------------------------------------------------------------------------|------|
| 1      | The National Health Policy 2017                                                                                                                                                    | 2017 |
| 2      | Health Sector Strategic Plan IV (HSSP IV) July 2015 – June 2020, Reaching all Households with Quality Health Care                                                                  | 2015 |
| 3      | Community Health Fund Act, 2001.                                                                                                                                                   | 2001 |
| 4      | The National Health Insurance Fund Act, 1999.                                                                                                                                      | 1999 |
| 5      | The National Social Security Fund Act, 1997                                                                                                                                        | 1997 |
| 6      | Tanzania Health Financing Strategy 2016-2026 Path towards Universal Health Coverage, Final Draft                                                                                   | 2016 |
| 7      | Direct Health Facility Financing (DHFF) & Roadmap Presented On 06.06.2017                                                                                                          | 2017 |
| 8      | National Health Accounts For Financial Years 2013/14, 2014/15 And 2015/16. The United Republic Of Tanzania Ministry of Health, Community Development, Gender, Elderly And Children | 2019 |
| 9      | Health Sector Public Expenditure Review 2016/17                                                                                                                                    | 2018 |
| 10     | Direct Health Facility Financing as a practical approach for strengthening strategic purchasing in Tanzania                                                                        | 2019 |
| 11     | Tanzania Health Insurance Regulatory Framework Review                                                                                                                              | 2012 |
| 12     | Health Sector Strategic Plan IV, Mid Term Review Presentation of Finding, Dar es Salaam – Tanzania                                                                                 | 2019 |
| 13     | Options for Expanding Private Sector Contributions to Health. Bethesda, MD: Strengthening Health Financing Capacity, Tanzania Project                                              | 2013 |
| 14     | Options For Health Insurance Market Structuring, For The Tanzania Health Financing Strategy, Final Report                                                                          | 2013 |
| 15     | Health Care Financing Strategy Background Paper #1: Options for the Minimum Benefits Package in Tanzania.                                                                          | 2013 |
| 16     | Tanzania Health Insurance Institutional Assessment In support of Health Financing Strategy Development, Dar es Salam, Tanzania.                                                    | 2013 |
| 17     | Development of the Tanzania Health Financing Strategy; Options paper nr. 6. Reform options for the CHF systems, Final Report, Dar es Salaam, Tanzania.                             | 2013 |
|        | Meeting documents                                                                                                                                                                  |      |
| 18     | Consultative Forum on Health Financing Strategy and National Health Insurance in Tanzania at Hotel Morena in Dodoma, Tanzania                                                      | 2018 |
| 19     | Meeting minutes from Tanzania Health Financing Technical Working Grouping Meeting (various)                                                                                        |      |
|        | i) Update on Implementation of CHF Iliyoboreshwa (iCHF)                                                                                                                            |      |
|        | ii) Minutes for health financing technical working group meeting held at CCM Conventional Hall – Dodoma, Tanzania                                                                  | 2020 |
|        | iii) Minutes for health financing technical working group meeting held at CCM conventional hall – Dodoma, Tanzania                                                                 | 2019 |
|        | iv) Ministry of Health, Community Development, Gender, Elderly And Children Health Financing TWG Meeting Dodoma, Tanzania                                                          | 2019 |
|        |                                                                                                                                                                                    | 2019 |

**Table S2: Key informant interview participants**

| <b>Institution</b> | <b>Department</b>              | <b>Region</b> | <b>No. interviewed</b> |
|--------------------|--------------------------------|---------------|------------------------|
| NHIF               | Regional Office                | Dar es salaam | 1                      |
| NHIF               | Headquarter                    | Dodoma        | 1                      |
| NSSF               | SHIB department                | Dar es salaam | 1                      |
| Pharm access       | Manager                        | Dar Es salaam | 1                      |
| PO-RALG            | Representative                 | Dodoma        | 1                      |
| External Partners  | HPSS Project                   | Dodoma        | 1                      |
| iCHF               | iCHF department at NHIF office | Dar es salaam | 1                      |
| Ministry of Health | Policy Department              | Dodoma        | 1                      |
| Private Insurance  | AAR                            | Dar Es salaam | 1                      |
